# Supplementary material for: Reversibly tunable helix inversion in supramolecular gels trigged by Co2+
Source: Royal Society of Chemistry journal article supplement (doi:10.1039/c4cc05699j), 2014-09-10
Supplement: c4cc05699j1.pdf [file c4cc05699j1.pdf]

## Electronic Supplementary Information (ESI)

### Reversibly tunable helix inversion in supramolecular gels triggered by $\text{Co}^{2+}$

*So Hyeon Park,<sup>a</sup> Sung Ho Jung,<sup>a</sup> Junho Ahn,<sup>a</sup> Ji Ha Lee,<sup>a</sup> Ki-Young Kwon,<sup>a</sup> Jiwon Jeon,<sup>b</sup>  
Hyungjun Kim,<sup>b\*</sup> Justyn Jaworski,<sup>c,d\*</sup> and Jong Hwa Jung<sup>a\*</sup>*

<sup>a</sup> *Dept. of Chemistry and Research Institute of Natural Sciences, Gyeongsang National University, Jinju, S. Korea. Fax: 055-758-6027; Tel: 055-772-1488; E-mail: [jonghwa@gnu.ac.kr](mailto:jonghwa@gnu.ac.kr)*

<sup>b</sup> *Dept. of Materials Science and Engineering, Korea Advanced Institute of Science and Technology (KAIST), Daejeon, S. Korea. E-mail: [linus16@kaist.ac.kr](mailto:linus16@kaist.ac.kr)*

<sup>c</sup> *Dept. of Chemical Engineering, Hanyang University, Seoul, S. Korea. Fax: 02 2220 1935; Tel: 02 2220 2339; E-mail: [justynj@hanyang.ac.kr](mailto:justynj@hanyang.ac.kr)*

<sup>d</sup> *Institute of Nano Science and Technology, 222 Wangsimni-ro, Seoul, S. Korea.*

## Experimental Section

**Characterization.** The  $^1\text{H}$  and  $^{13}\text{C}$  NMR spectra were taken on a Bruker DRX 300, and mass spectroscopy samples were analyzed on a JEOL JMS-700 mass spectrometer. The elemental analysis was performed with a Perkin Elmer 2400 series II instrument.

**Preparation of Supramolecular Gel.** In a typical gelation study experiment, a solution of  $\text{Co}^{2+}$  [0.1-1.0 equiv.] in THF was added to solution of  $\text{L}_1$  or  $\text{L}_2$  in THF in a vial. Each mixture was heated for three minutes to get a homogenous solution. This solution was allowed to cool to ambient temperature gradually to afford gel.

**Microscopy Studies.** The SEM images were taken with a field emission scanning electron microscope (FE-SEM, Philips XL30 S FEG) using an acceleration voltage of 10–15 kV and an emission current of 10  $\mu\text{A}$ .

**Circular Dichroism Studies.** The CD spectra were recorded on a Jasco J-815 CD spectrophotometer. CD spectra were determined over the range of 230-700 nm using a quartz cell with 0.1 mm path length. Scans were taken at a rate of 100 nm/min with a sampling interval of 1.0 nm and response time of 1s. The scans were acquired for the gel directly at room temperature in THF. CD spectra of L ([L]=8 mM) were observed in the presence of  $\text{Co}^{2+}$  (0-1 equiv.).

**NMR Studies.** The L solution (700  $\mu\text{L}$ , 3.5  $\mu\text{mol}$ , 0.005 M in  $\text{THF-}d_8$ ) was transferred by a micro pipet to an NMR tube. Approximately the  $\text{Co}(\text{NO}_3)_2 \cdot 6\text{H}_2\text{O}$  solution (9  $\mu\text{L}$ , 0.525  $\mu\text{mol}$ , 0.0583 M in  $\text{THF-}d_8$ ) was added *via* Hamilton syringe to an NMR tube and the sample was sealed. The sample was heated to get a homogenous solution and cooled to room temperature.  $^1\text{H}$  NMR spectrum was measured with average 1100 scans at ambient temperature. As the cobalt solution (9  $\mu\text{L}$ , 6  $\mu\text{L}$ , 6  $\mu\text{L}$ , 6  $\mu\text{L}$ , 12  $\mu\text{L}$ , and 12  $\mu\text{L}$ ) was added stage by stage, the procedure was repeated.

**Reversibility of complexes  $\text{L}_1$  by NMR and CD.** The  $\text{L}_1$  solution (450  $\mu\text{L}$ , 2.5  $\mu\text{mol}$ , 1 equiv., 0.0056 M in  $\text{THF-}d_8$ ) and the  $\text{Co}(\text{NO}_3)_2 \cdot 6\text{H}_2\text{O}$  solution (50  $\mu\text{L}$ , 2.5  $\mu\text{mol}$ , 1 equiv, 0.05 M in  $\text{THF-}d_8$ ) were transferred by a micro pipet to an NMR tube. The total concentration of  $\text{L}_1$  was 0.005 M. The sample was sealed and heated to get a homogenous solution and cooled to room temperature.  $^1\text{H}$  NMR spectrum was measured with average 1100 scans at ambient temperature. As the  $\text{L}_1$  solution of 0.005 M (88.2  $\mu\text{L}$ , 245.1  $\mu\text{L}$ , 166.7  $\mu\text{L}$ , 428.6  $\mu\text{L}$ , and 23.1  $\mu\text{L}$ ) was added stage by stage, the procedure was repeated. The equivalent of  $\text{Co}^{2+}$  was reduced to 0.85, 0.60, 0.50, 0.35, and 0.30 equivalents. The total concentration of  $\text{L}_1$  was 0.008 M instead of 0.005 M when the CD spectra were performed.

**DFT Calculation.** We performed density functional theory (DFT) calculations by employing M06-2X functional [Zhao, Y.; Truhlar, D. *Theor. Chem. Acc.* 2008, 120, 215.] with LACVP\*\* basis set [Hay, P. J.; Wadt, W. R. J. *Chem. Phys.* 1985, 82, 270.] as implemented in Jaguar 8.2 [Jaguar, version 8.2; Schrodinger, LLC, New York, 2013].

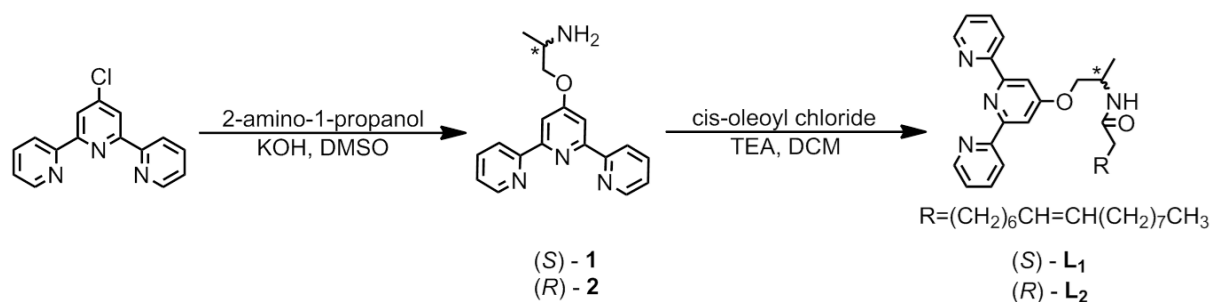

Scheme S1 Synthesis of  $\text{L}_1$  and  $\text{L}_2$

**Synthesis of compound 1 :** To a stirred suspension of powdered KOH(1.05 g, 18.7 mmol) in dry DMSO(20 mL) at 60 °C, the (*S*)-(+)-2-amino-1-propanol(0.28 g, 3.7 mmol) was added. After 30min, 4'-chloro-2,2':6',2''-terpyridine(1.00 g, 3.7 mmol) was added and the mixture was stirred for 4 h at 70 °C and then poured into 600 mL of distilled water. The aqueous phase was extracted with CH<sub>2</sub>Cl<sub>2</sub> (3×200 mL). The combined organic phases were dried over Na<sub>2</sub>SO<sub>4</sub> and evaporated in vacuo, and the residue was recrystallized from ethyl acetate to give 0.72 g (72 %) of **1**. Mp = 118.3 °C, <sup>1</sup>H-NMR(300 MHz, CDCl<sub>3</sub>) 8.7(d, 2H, ArH, *J*=4.7 Hz), 8.6(d, 2H, ArH, *J*=7.4 Hz), 8.0(m, 4H, ArH), 7.5(m, 2H, ArH), 4.0(m, 2H, -O-CH<sub>2</sub>-CH-), 3.2(dd, 1H, -CH-, *J*=6.3 Hz and *J*=12.5 Hz), 1.7(s, 2H, -NH<sub>2</sub>), 1.1(d, 3H, -CH<sub>3</sub>, *J*=6.4 Hz). <sup>13</sup>C-NMR(125MHz, CDCl<sub>3</sub>) 160.2, 156.5, 154.2, 148.9, 123.7, 120.8, 105.2, 70.1, 48.1, 21.4. ESI-MS (m/z) calcd. for C<sub>18</sub>H<sub>18</sub>N<sub>4</sub>O: 306.2; 307.4 [M+H]<sup>+</sup>. Element analysis: calculated for C<sub>18</sub>H<sub>18</sub>N<sub>4</sub>O : C 70.6, H 5.9, N 18.3 Found: C 70.1, H 5.5, N 17.8.

**Synthesis of compound 2 :** The synthesis of **2** was performed as described in the synthesis of **1**. The (*R*)-(-)-2-amino-1-propanol was used in place of the (*S*)-(+)-2-amino-1-propanol. Mp = 117.6 °C. <sup>1</sup>H-NMR(300 MHz, CDCl<sub>3</sub>) 8.7(d, 2H, ArH, *J*=4.6 Hz), 8.6(d, 2H, ArH, *J*=7.4 Hz), 8.0(m, 4H, ArH), 7.5(m, 2H, ArH), 4.0(m, 2H, -O-CH<sub>2</sub>-CH-), 3.2(dd, 1H, -CH-, *J*=6.3 Hz and *J*=12.8 Hz), 1.7(s, 2H, -NH<sub>2</sub>), 1.1(d, 3H, -CH<sub>3</sub>, *J*=6.2 Hz). <sup>13</sup>C-NMR(125MHz, CDCl<sub>3</sub>) 160.7, 156.5, 155.7, 149.0, 123.7, 121.0, 105.3, 70.1, 48.1, 20.5. ESI-MS (m/z) calcd. for C<sub>18</sub>H<sub>18</sub>N<sub>4</sub>O: 306.2; 307.1 [M+H]<sup>+</sup>. Element analysis: calculated for C<sub>18</sub>H<sub>18</sub>N<sub>4</sub>O: C 70.6, H 5.9, N 18.3 Found C 70.2, H 5.5, N 17.9.

**Synthesis of compound L<sub>1</sub> :** In a two neck flask, **1** (0.40 g, 1.3 mmol) and TEA (0.40 g, 3.9 mmol) were poured into dry CH<sub>2</sub>Cl<sub>2</sub>(10 mL). The solution was cooled in an ice bath and magnetically stirred after which oleoyl chloride (0.59 g, 2.0 mmol) was added dropwise. The reaction mixture was stirred for 12 h at room temperature. The solvent was evaporated under reduced pressure. The crude product thus obtained was purified by column chromatography on Al<sub>2</sub>O<sub>3</sub> (eluent: ethyl acetate/*n*-hexane 1/4) to yield 0.43 g (58 %) of **L<sub>1</sub>**. Mp = 100.4 °C. <sup>1</sup>H-NMR(300 MHz, DMSO-d<sub>6</sub>) 8.7(d, 2H, ArH, *J*=4.6 Hz), 8.6(d, 2H, ArH, *J*=7.9 Hz), 8.0(td, 4H, ArH, *J*=2.4 Hz, *J*=2.4 Hz, and *J*=7.6 Hz), 7.9(d, 1H, -NH, *J*=7.5 Hz), 7.5(dd, 2H, ArH, *J*=4.9 Hz and *J*=6.9 Hz), 5.3(m, 2H, -CH=CH-), 4.2(td, 3H, -O-CH<sub>2</sub>-CH-, *J*=5.9 Hz, *J*=5.9 Hz, and *J*=18.3 Hz), 2.1(t, 2H, -CO-CH<sub>2</sub>-, *J*=7.0 Hz and *J*=7.0 Hz), 1.9(dd, 4H, -CH<sub>2</sub>-CH=CH-, *J*=5.6 Hz and *J*=9.3 Hz), 1.5(d, 2H, -CO-CH<sub>2</sub>-CH<sub>2</sub>-, *J*=4.9 Hz), 1.2(d, 23H, -O-CH<sub>2</sub>-CH-CH<sub>3</sub> and -(CH<sub>2</sub>)<sub>4</sub>-CH=CH-(CH<sub>2</sub>)<sub>6</sub>-, *J*=7.1 Hz), 0.8(t, 3H, -CH<sub>3</sub>, *J*=6.6 Hz and *J*=6.6 Hz). <sup>13</sup>C-NMR (125MHz, DMSO-d<sub>6</sub>) 171.8, 166.6, 156.6, 154.8, 149.1, 137.2, 129.5, 129.4, 124.4, 120.7, 106.7, 70.4, 43.6, 35.4, 31.2, 29.0, 28.5, 28.4, 26.4, 25.2, 22.0, 17.0, 13.8. ESI-MS (m/z) calcd. for C<sub>36</sub>H<sub>50</sub>N<sub>4</sub>O<sub>2</sub>: 570.4; 571.2 [M+H]<sup>+</sup>. Element analysis: calculated for C<sub>36</sub>H<sub>50</sub>N<sub>4</sub>O<sub>2</sub> : C 75.8, H 8.8, N 9.8 Found : C 76.2, H 8.5, N 9.5.

**Synthesis of compound L<sub>2</sub> :** The synthesis of **L<sub>2</sub>** was performed as described in the synthesis of **L<sub>1</sub>**. The **2** was used in place of **1**. Mp = 100.5 °C. <sup>1</sup>H-NMR(300 MHz, DMSO-d<sub>6</sub>) 8.7(d, 2H, ArH, *J*=4.2 Hz), 8.6(d, 2H, ArH, *J*=7.9 Hz), 8.0(m, 4H, ArH), 7.9(d, 1H, -NH, *J*=7.5 Hz), 7.5(dd, 2H, ArH, *J*=5.2 Hz and *J*=6.9 Hz), 5.2(t, 2H, -CH=CH-, *J*=5.8 Hz and 5.8 Hz), 4.2(td, 3H, -O-CH<sub>2</sub>-CH-, *J*=5.7 Hz, *J*=5.7 Hz, and *J*=12.3 Hz), 2.1(t, 2H, -CO-CH<sub>2</sub>-, *J*=7.0 Hz and *J*=7.0 Hz), 1.9(m, 4H, -CH<sub>2</sub>-CH=CH-), 1.5(s, 2H, -CO-CH<sub>2</sub>-CH<sub>2</sub>-), 1.2(d, 23H, -O-CH<sub>2</sub>-CH-CH<sub>3</sub> and -(CH<sub>2</sub>)<sub>4</sub>-CH=CH-(CH<sub>2</sub>)<sub>6</sub>-, *J*=10.0 Hz), 0.8(t, 3H, -CH<sub>3</sub>, *J*=6.5 Hz and *J*=6.5 Hz). <sup>13</sup>C-NMR (125MHz, DMSO-d<sub>6</sub>) 171.8, 167.3, 156.6, 155.1, 149.3, 137.0, 129.5, 129.5, 124.3, 121.1, 106.4, 71.1, 43.6, 35.3, 31.0, 28.9, 28.3, 28.2, 26.7, 25.9, 22.1, 17.1, 13.7. ESI-MS (m/z) calcd. For C<sub>36</sub>H<sub>50</sub>N<sub>4</sub>O<sub>2</sub>: 570.4; 571.1 [M+H]<sup>+</sup>. Element analysis: calculated for C<sub>36</sub>H<sub>50</sub>N<sub>4</sub>O<sub>2</sub>: C75.8, H 8.8, N 9.8 Found C 76.1, H 8.4, N 9.9.

**A**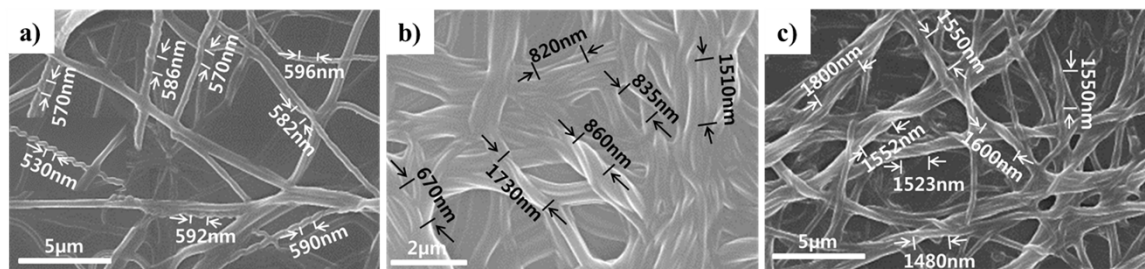**B**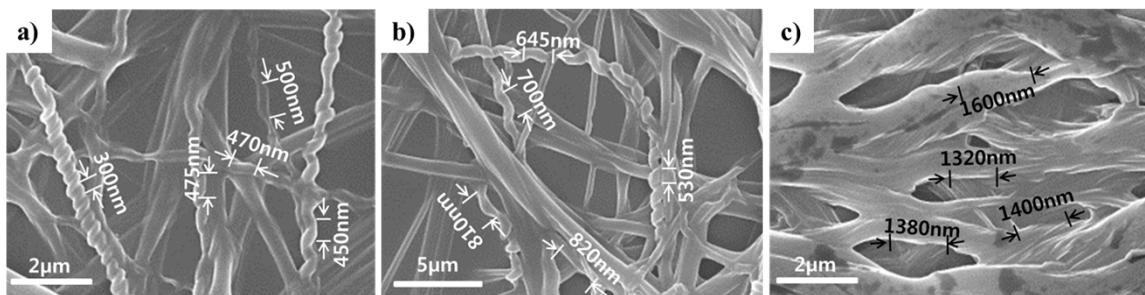

**Fig. S1** FE-SEM images of the organogel L<sub>1</sub> (A) and L<sub>2</sub> (B) with (a) 0.5, (b) 0.6 and (c) 1.0 equivalents of Co<sup>2+</sup>.

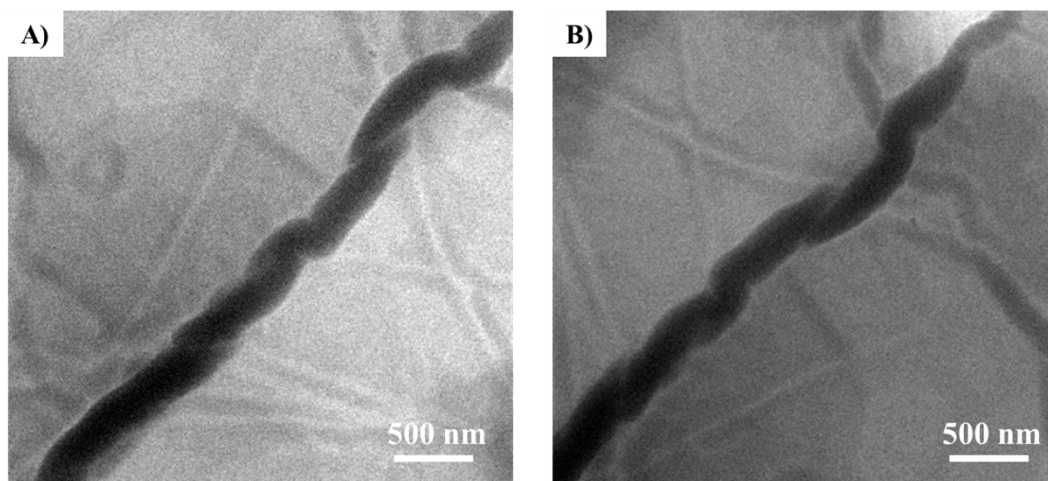

**Fig. S2** TEM images of organogels L<sub>1</sub> (A) and L<sub>2</sub> (B) with 1.0 equivalents of Co<sup>2+</sup>.

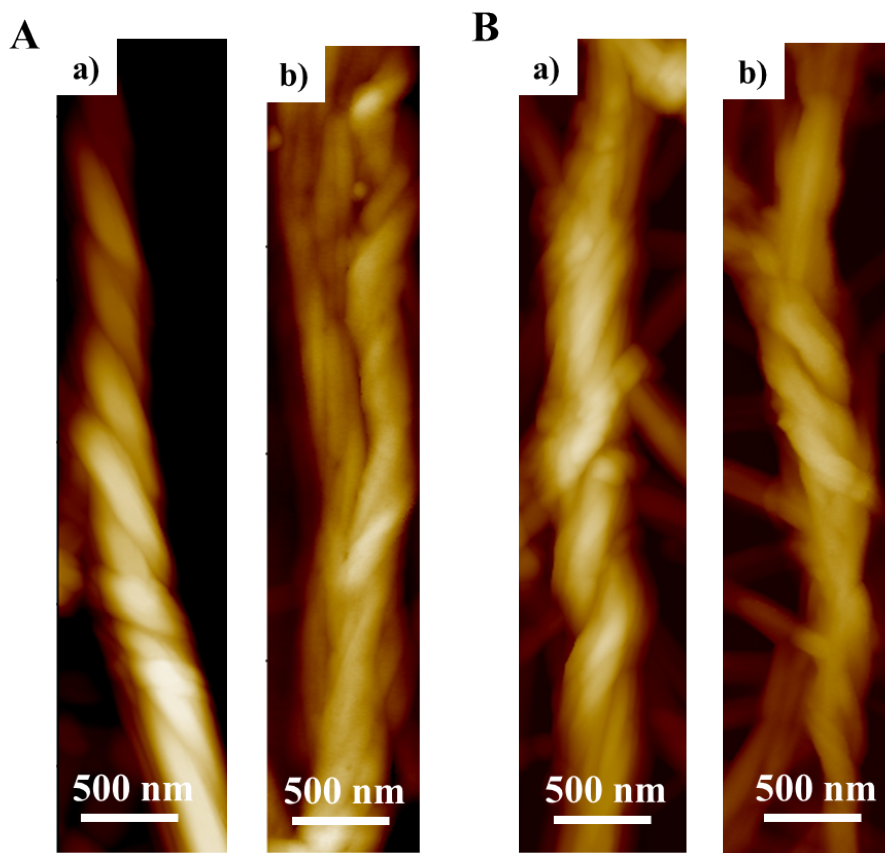

**Fig. S3** AFM images of the organogel  $L_1$  (A) and  $L_2$  (B) with (a) 0.5 and (b) 1.0 equivalents of  $Co^{2+}$ .

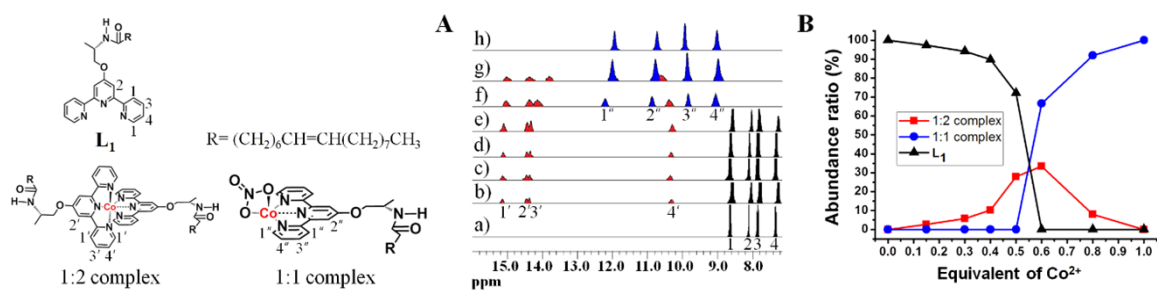

**Fig. S4** (A)  $^1H$  NMR spectra of the organogel  $L_1$  with (a) 0, (b) 0.15, (c) 0.3, (d) 0.4, (e) 0.5, (f) 0.6, (g) 0.8, and (h) 1.0 equiv. of  $Co^{2+}$  in  $THF-d_8$ .  $[L_1] = 5 \times 10^{-3}$  M. (B) Abundance ratio of each species in several equivalents of  $Co^{2+}$  in  $THF-d_8$  at room temperature. Red and blue colors indicate 1:2 and 1:1 complexes, respectively.

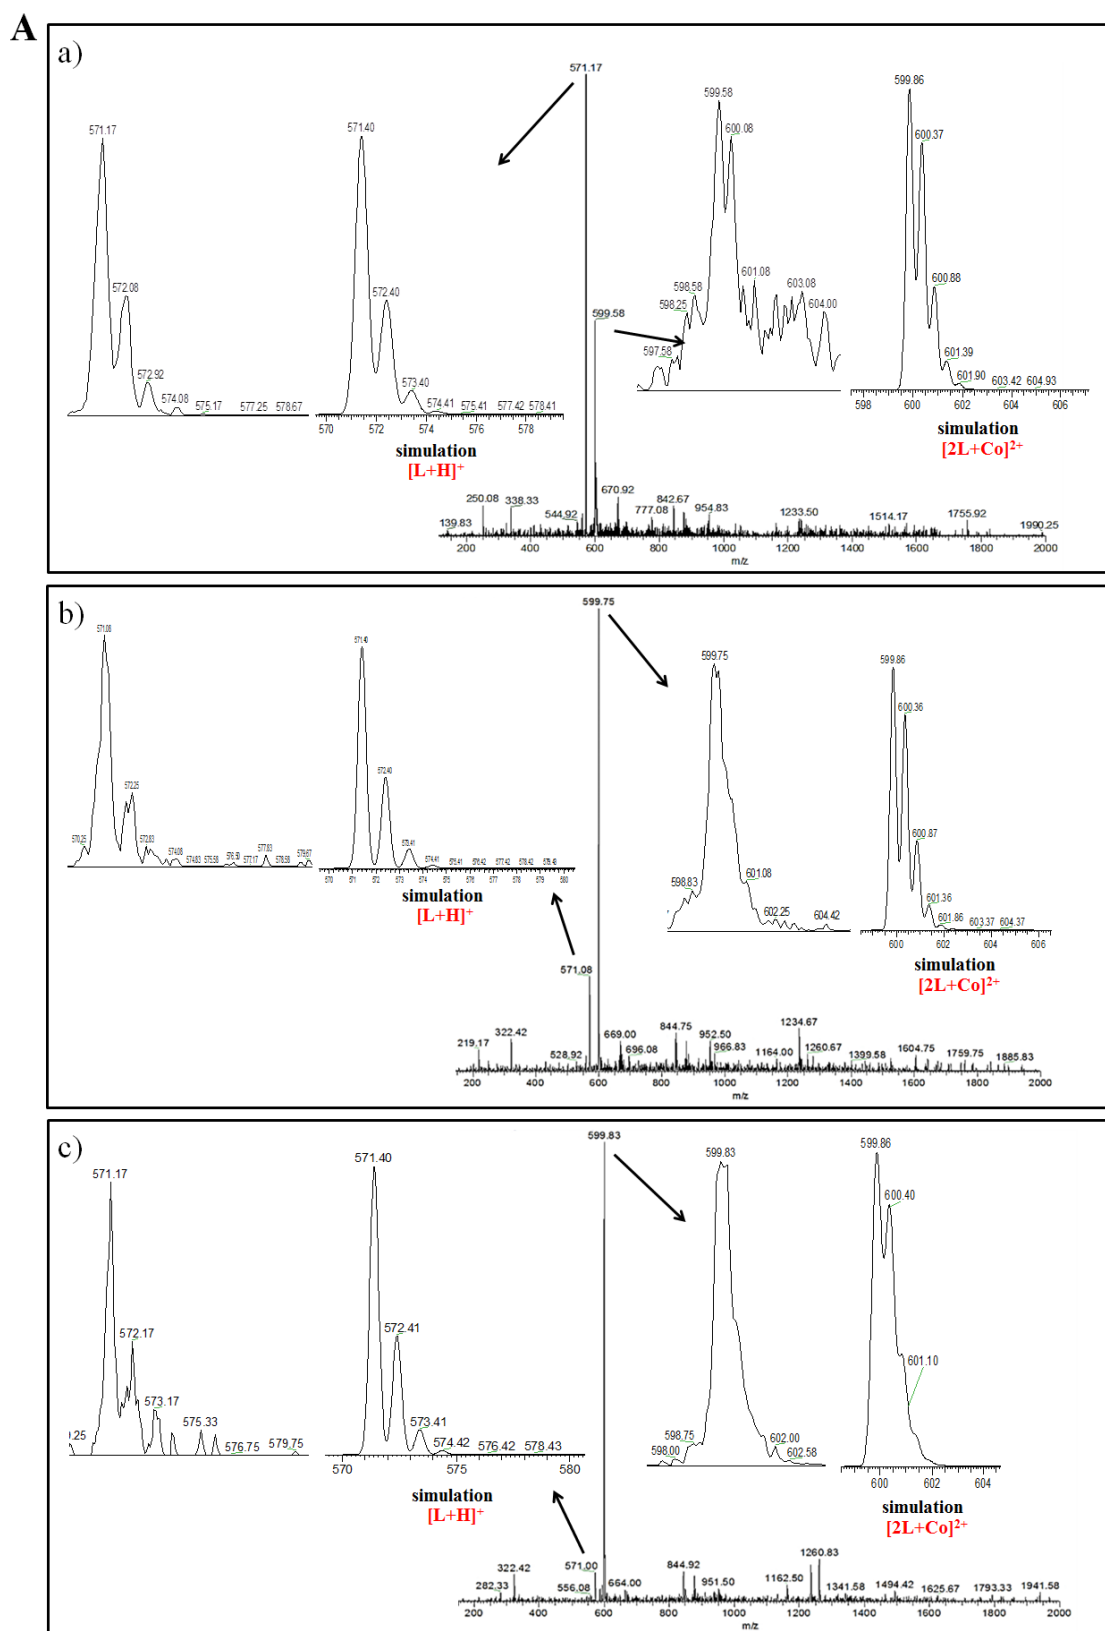

**Fig. S5** ESI-mass spectra of organogel  $L_1$  in several equivalents of  $Co^{2+}$ . (A) 0.2, 0.4 and 0.5 (a~c) equivalents of  $Co^{2+}$ .

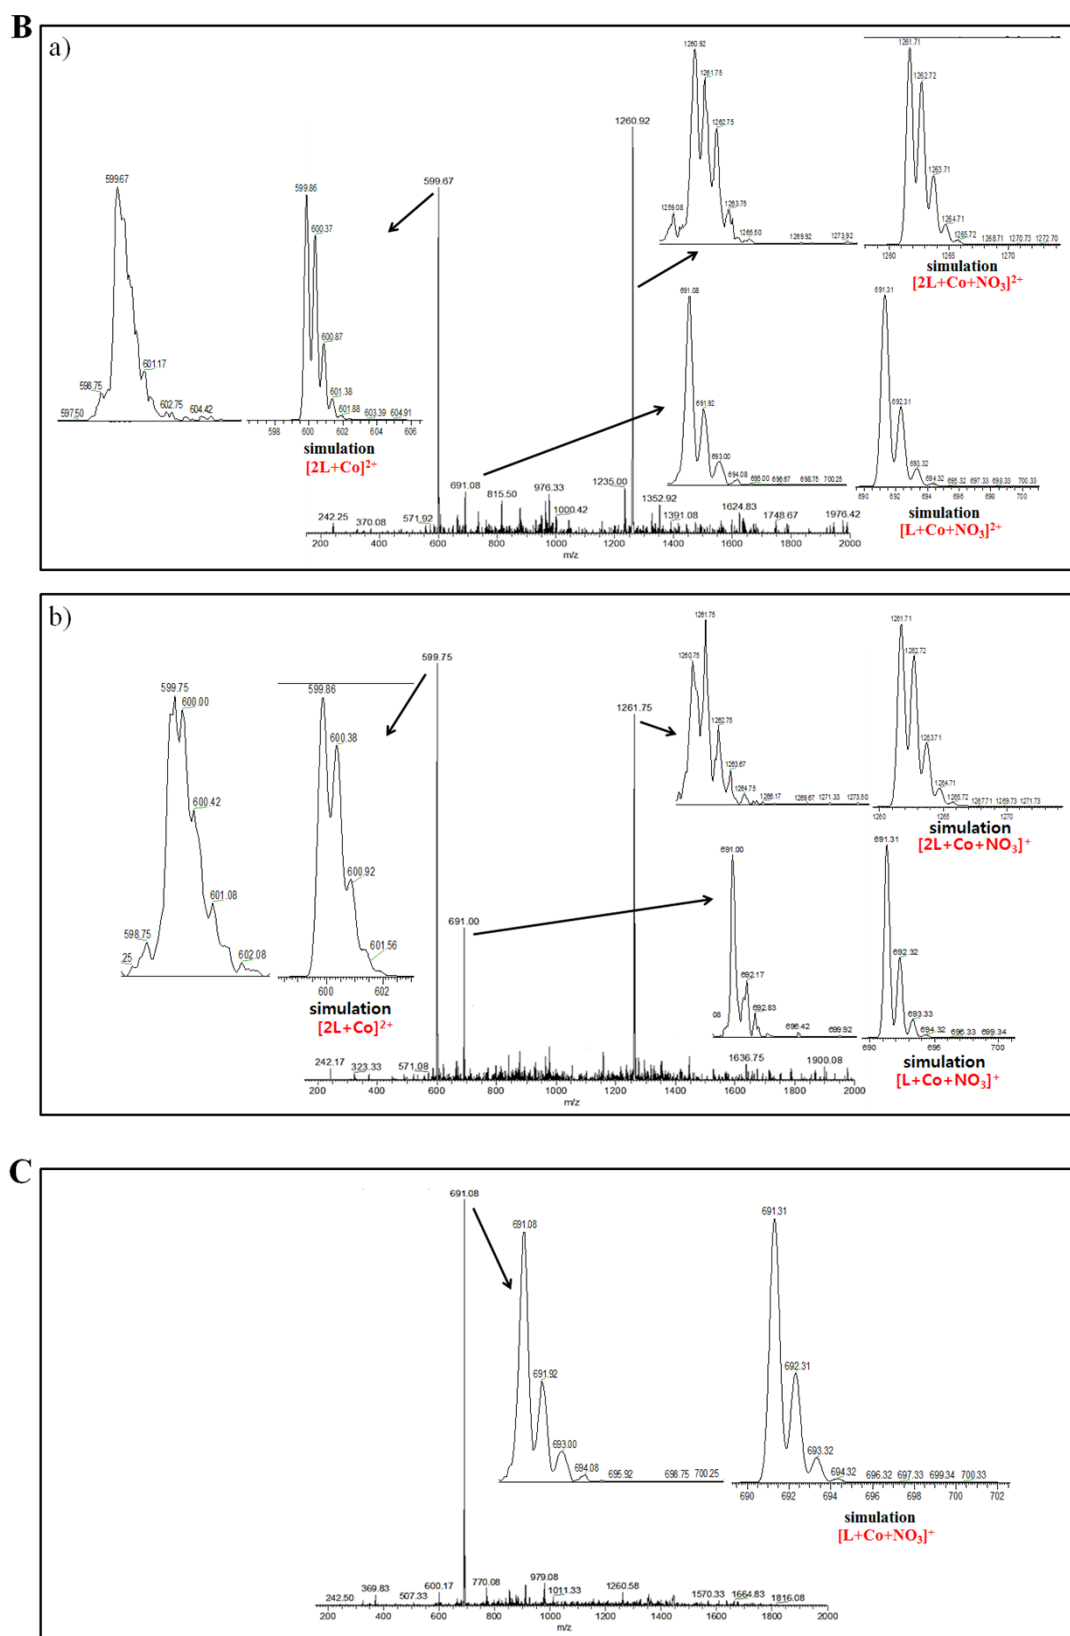

**Fig. S5** ESI-mass spectra of organogel  $L_1$  in several equivalents of  $Co^{2+}$ . (B) 0.6, 0.8 (a-b), and (C) 1.0 equivalents of  $Co^{2+}$ .

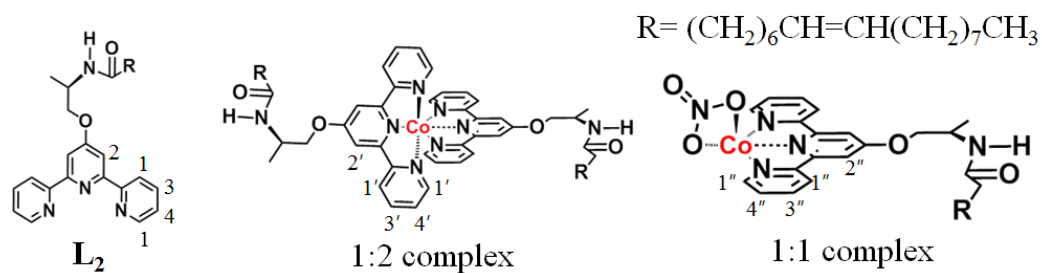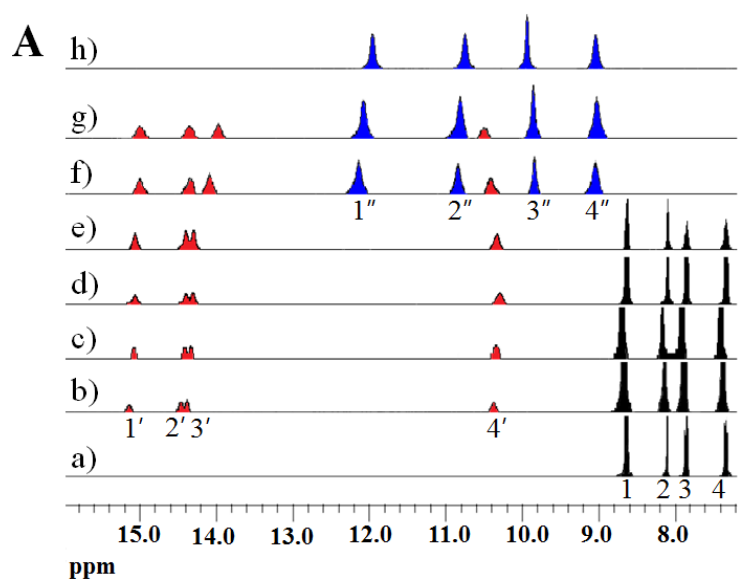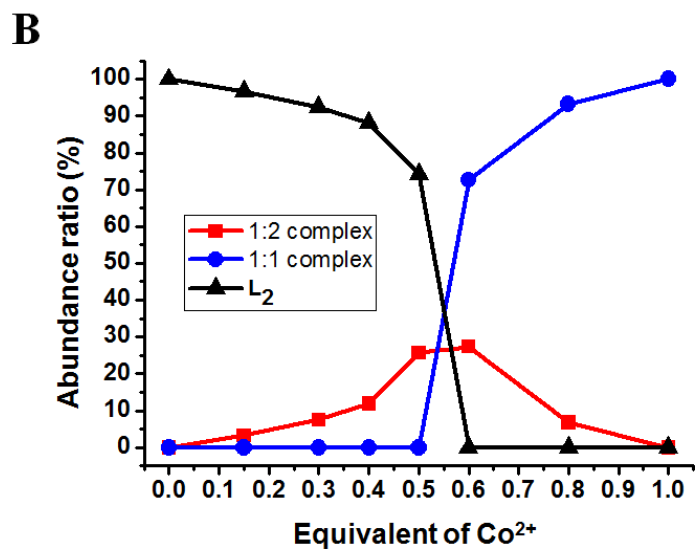

**Fig. S6** (A) <sup>1</sup>H NMR spectra of the organogel **L<sub>2</sub>** with (a) 0, (b) 0.15, (c) 0.3, (d) 0.4, (e) 0.5, (f) 0.6, (g) 0.8, and (h) 1.0 equivalents of Co<sup>2+</sup> in THF-*d*<sub>8</sub> at room temperature. [**L<sub>2</sub>**] = 5 × 10<sup>-3</sup> M. (B) Abundance ratio of each species in several equivalents of Co<sup>2+</sup> in THF-*d*<sub>8</sub> at room temperature.



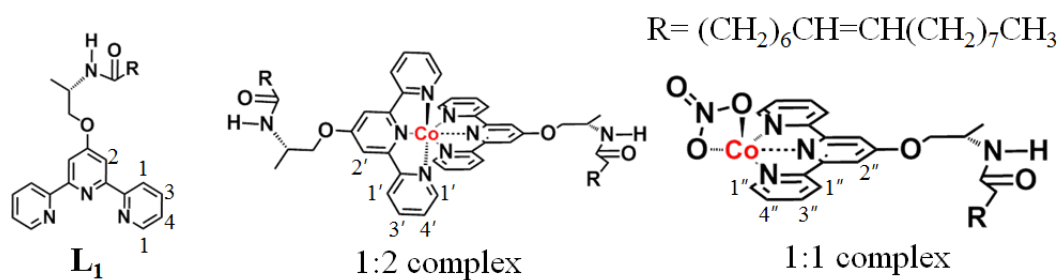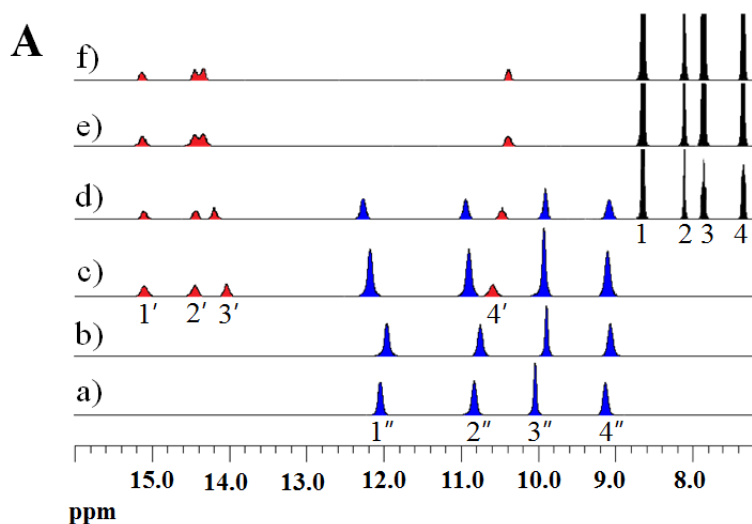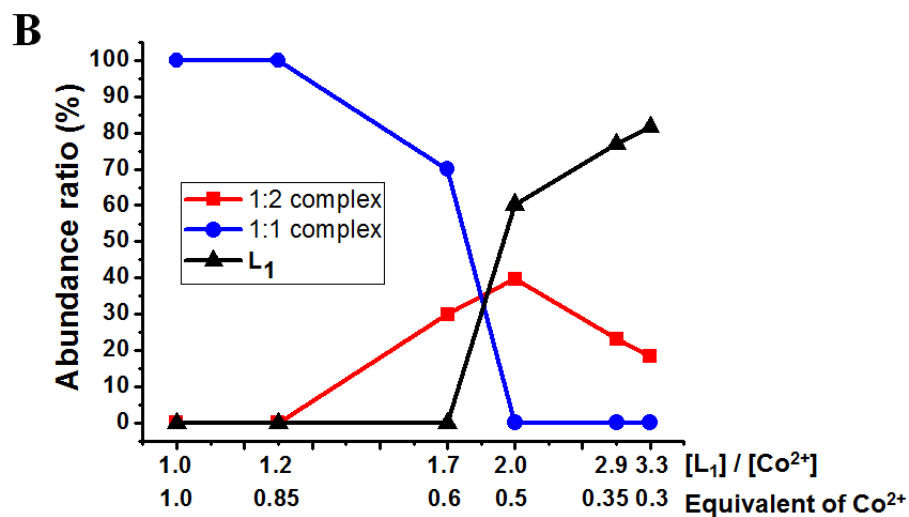

**Fig. S7** (A) <sup>1</sup>H NMR spectra of the organogel **L**<sub>1</sub> with (a) 1.0, (b) 0.85, (c) 0.6, (d) 0.5, (e) 0.35, and (f) 0.3 equivalents of Co<sup>2+</sup> in THF-*d*<sub>8</sub> at room temperature. [**L**<sub>1</sub>] = 5 × 10<sup>-3</sup> M. (B) Abundance ratio of each species in the presence of 1.0 equivalent of Co<sup>2+</sup> upon addition of **L**<sub>1</sub> in THF-*d*<sub>8</sub> at room temperature. [**L**<sub>1</sub>] = 5 × 10<sup>-3</sup> M.

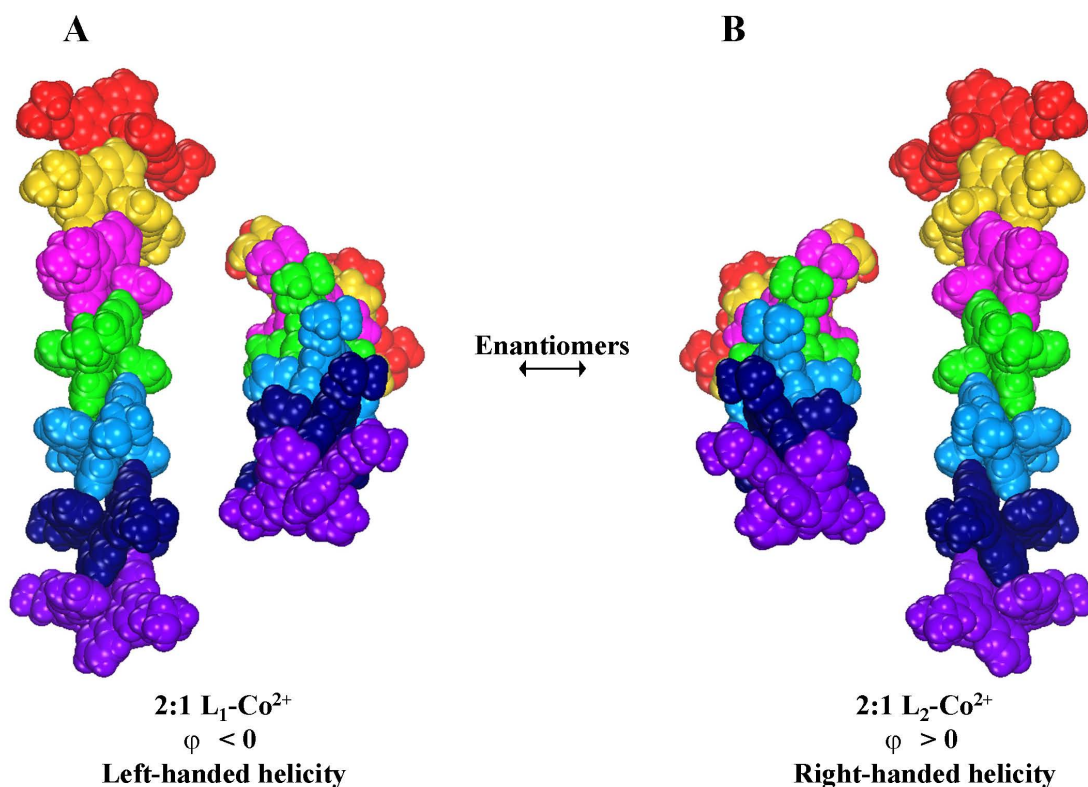

**Fig. S8** (A) Left-handed helical fiber and (B) right-handed helical fiber induced by non-coplanar terpyridine ligands. When  $\varphi < 0$ , left-handed helicity is induced, and when  $\varphi > 0$ , right-handed one is. To more clearly illustrate how the assembly of Co complexes with non-zero  $\varphi$  induces the overall helical structure, we showed  $\varphi = \pm 20^\circ$  cases, which is more exaggerated than the optimized structure from density functional theory (DFT) calculation ( $\varphi = \pm 0.5^\circ$ ).

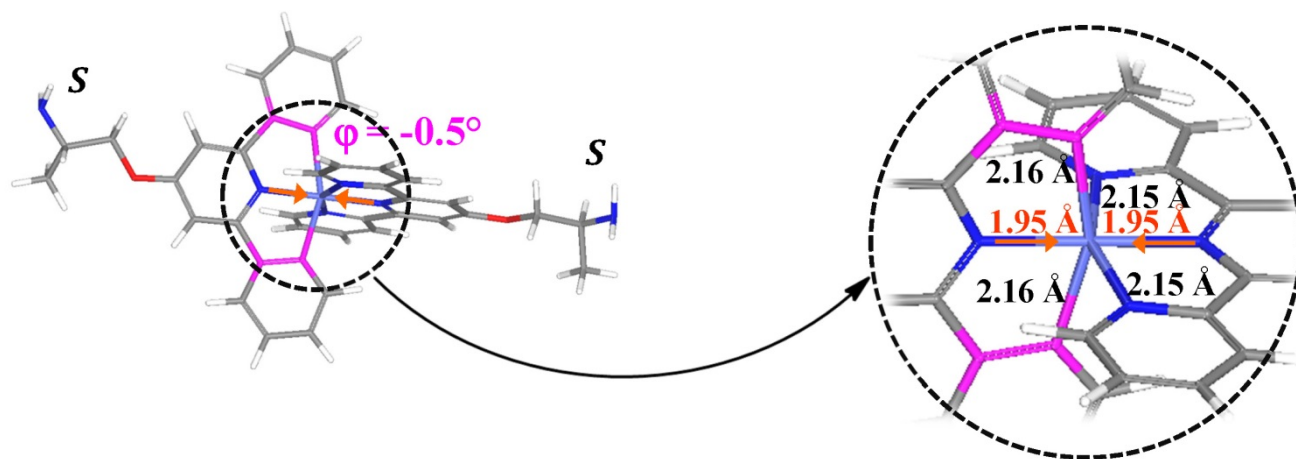

**Fig. S9**  $Co^{2+}$  coordinated by terpyridines is known as a low-spin  $d^7$  complex. Due to the unevenly occupied  $e_g$  orbitals, strong Jahn-Teller effect occurs, yielding two short bonds (1.95 Å) along the axial directions with four long bonds (2.15 Å) along the equatorial directions. Such a local distortion around the Co center causes the twisted terpyridine ligands.

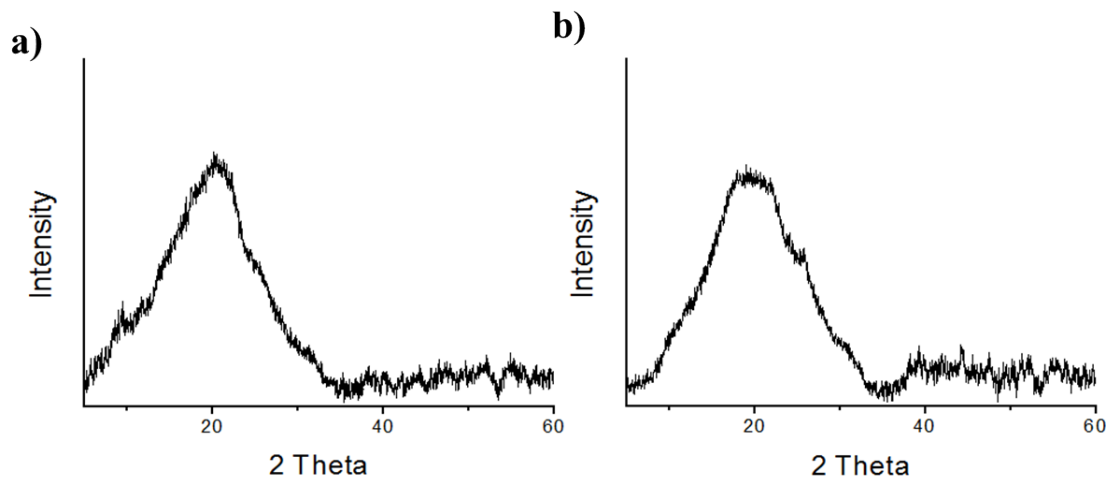

Fig. S10 Powder XRD patterns of xerogels  $L_1$  with a) 0.5 and b) 1.0 equivalent of  $Co^{2+}$ .

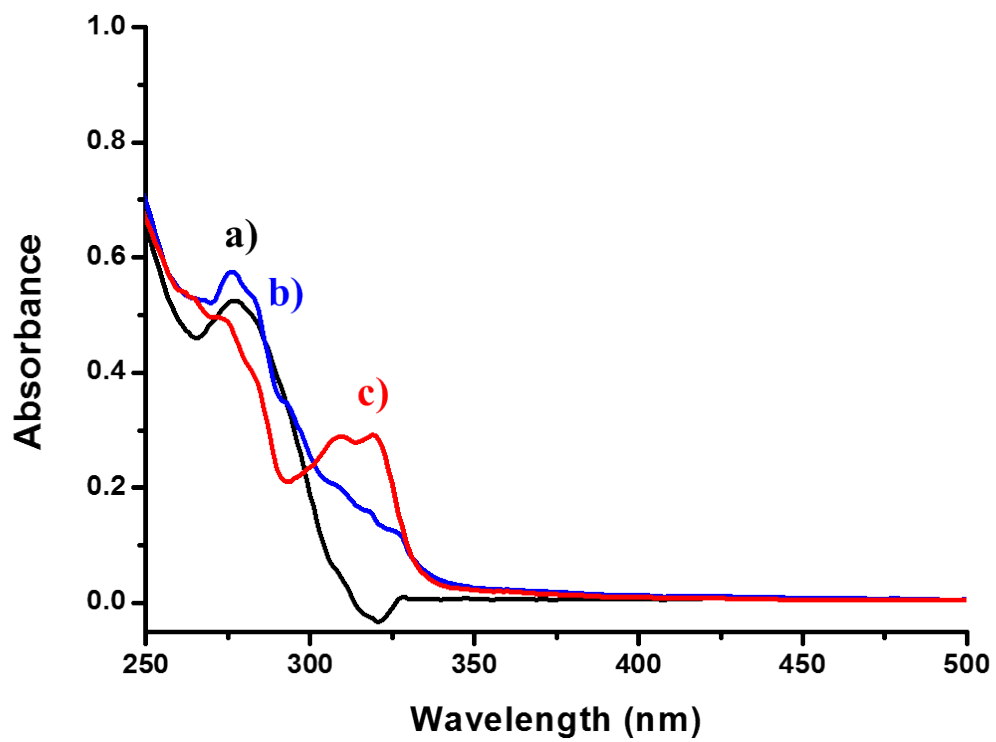

Fig. S11 UV-Vis spectra of  $L_1$  with (a) 0 (black line), (b) 0.5 (blue line) and (c) 1.0 (red line) equivalent of  $Co^{2+}$ .

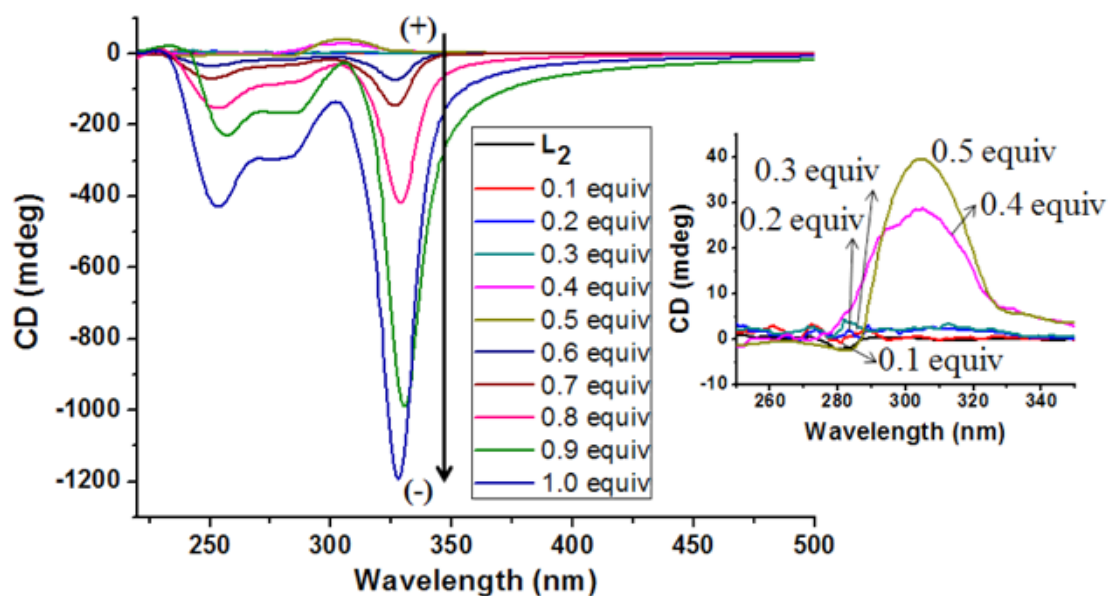

**Fig. S12** CD spectral changes of organogel  $L_2$  in several equivalents of  $Co^{2+}$  at room temperature.  $L_2=8 \times 10^{-3}$  M, 1.0 mm cuvette.

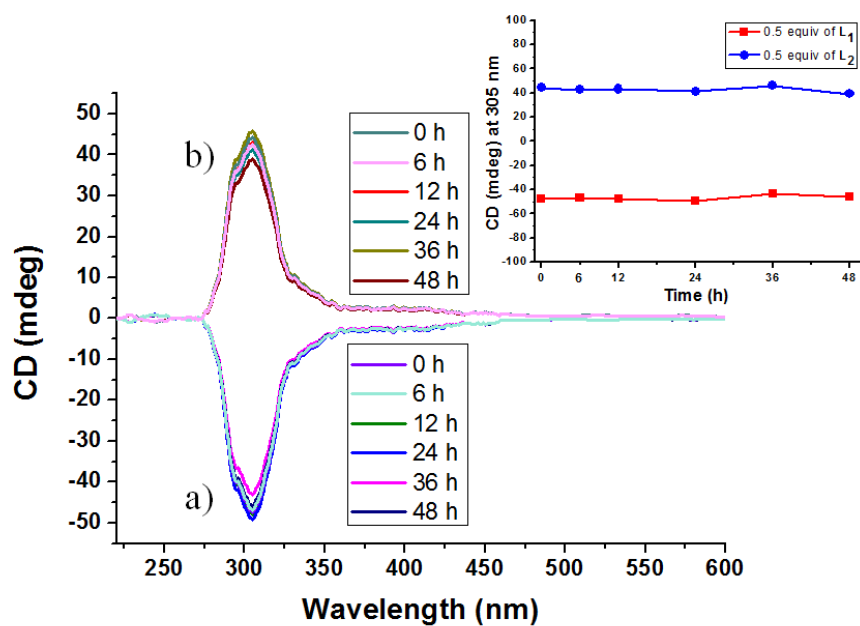

**Fig. S13** Time-independent CD spectral changes of organogel (a)  $L_1$  and (b)  $L_2$  with 0.5 equivalents of  $Co^{2+}$  in THF at room temperature. Inset: plot of the CD amplitude at 305 nm versus time.  $[L_1] = [L_2] = 8 \times 10^{-3}$  M, 1.0 mm cuvette.

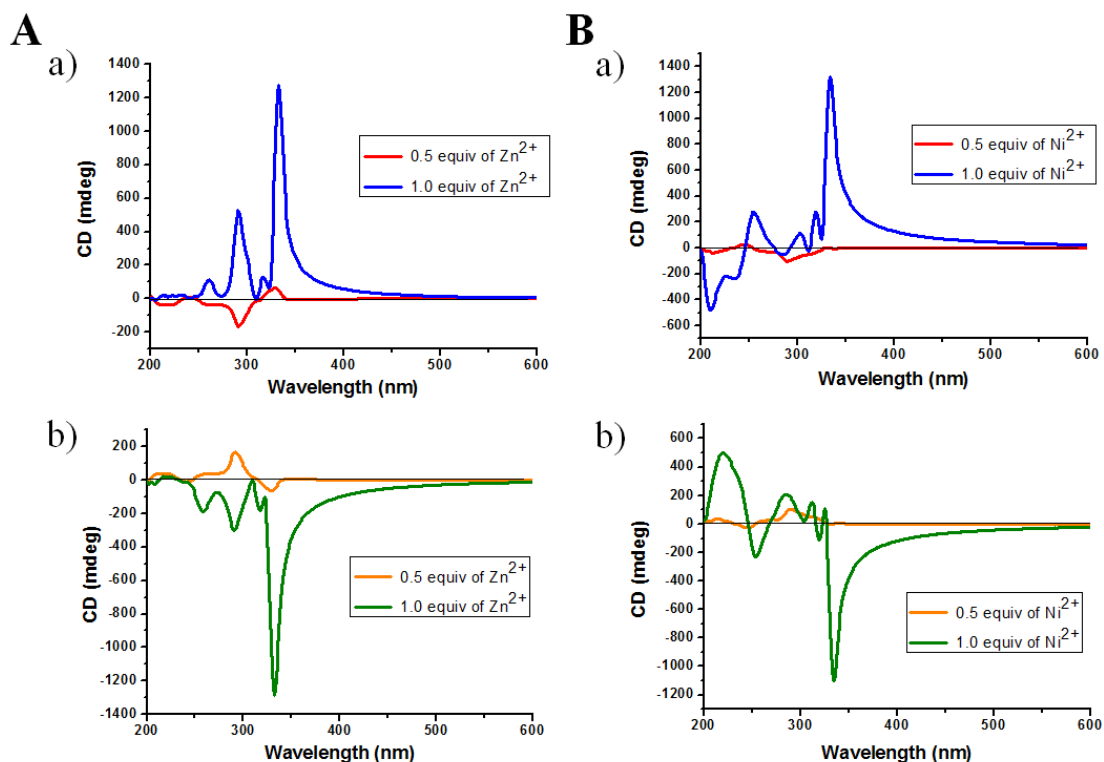

**Fig. S14** CD spectral changes of organogel (a)  $L_1$  and (b)  $L_2$  with 0.5, and 1.0 equivalents of (A)  $Zn^{2+}$  and (B)  $Ni^{2+}$  at room temperature.  $[L_1] = [L_2] = 8 \times 10^{-3}$  M, 1.0 mm cuvette.

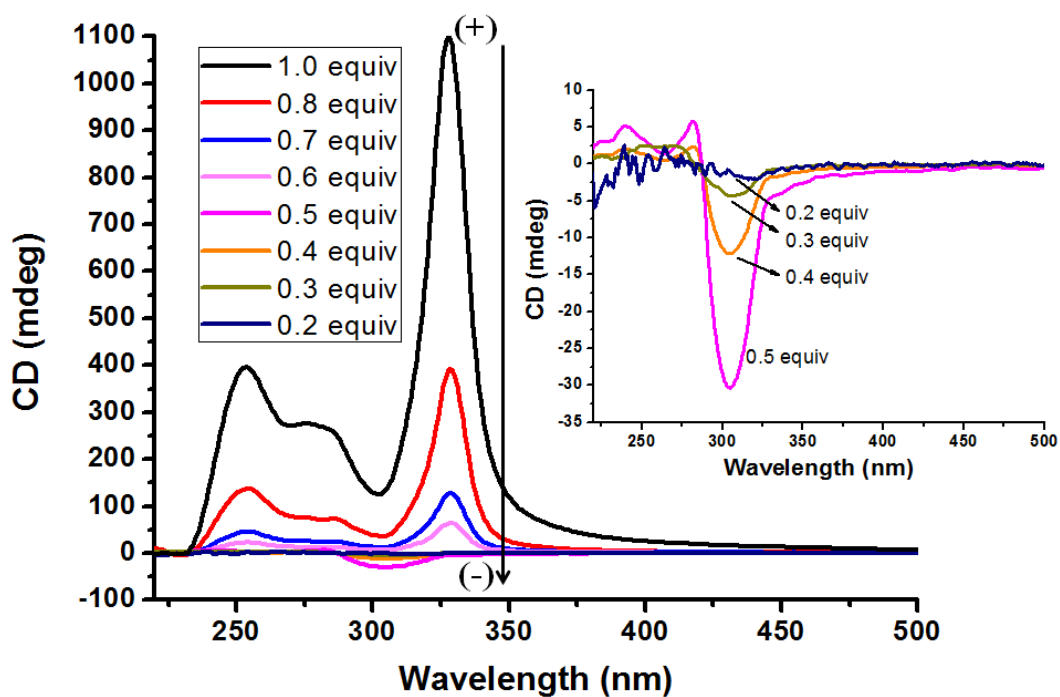

**Fig. S15** CD spectra changes of organogel  $L_1$  in the presence of 1.0 equivalents of  $Co^{2+}$  upon addition of  $L_1$  in THF at room temperature.  $[L_1] = 8 \times 10^{-3}$  M.

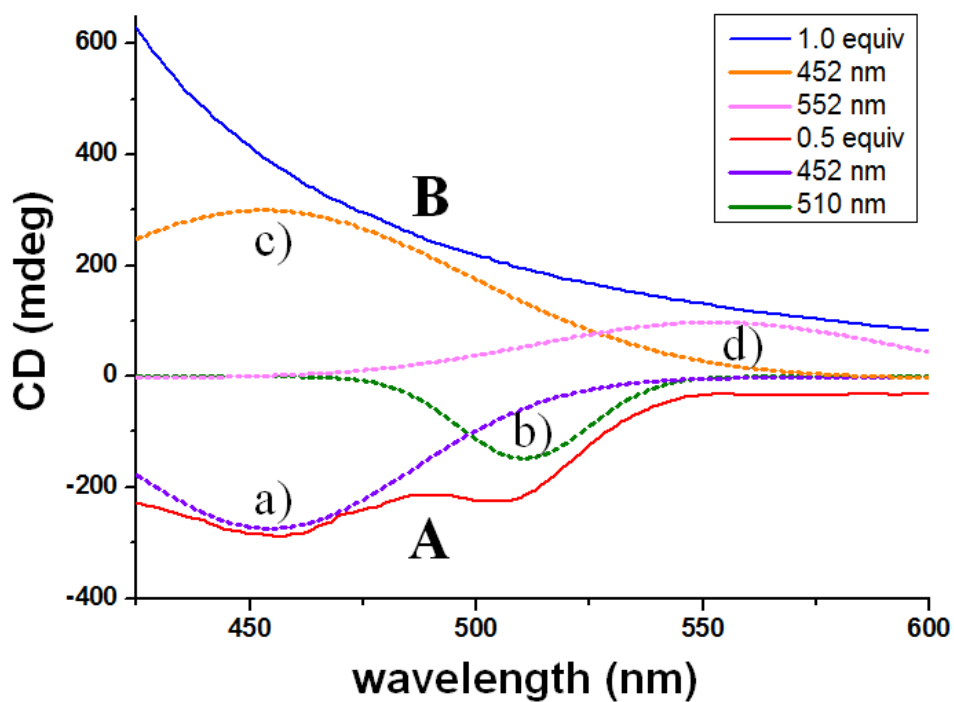

**Fig. S16** CD spectra of organogel  $L_1$  with (A) 0.5 and (B) 1.0 equivalents of  $Co^{2+}$  at room temperature. (a and b, c and d) CD spectra obtained from curve-fitting of spectrum (A, B).  $[L_1] = 1 \times 10^{-1}$  M, 1.0 mm cuvette.

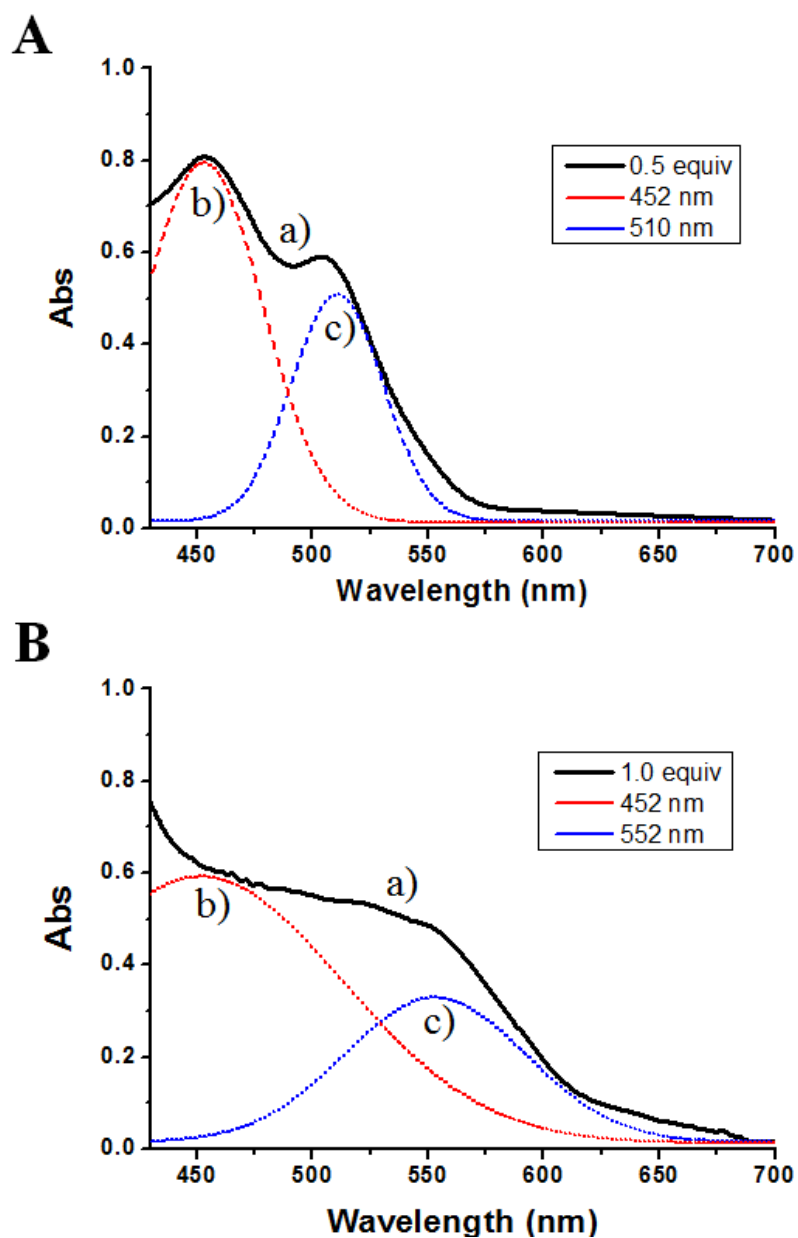

**Fig. S17** UV-vis absorption spectra of organogel  $L_1$  with (A) 0.5 and (B) 1.0 equivalents of  $Co^{2+}$  at room temperature. (b and c) UV-vis absorption spectra obtained from curve-fitting of spectrum (a).  $[L_1] = 1 \times 10^{-1}$  M, 1.0 mm cuvette.
